# Supplementary material for: La suspensión sin garantía de los actos tributarios: un derecho sin pleno contenido material en España: causas, efectos y soluciones
Source: Oxford University Press journal article supplement (doi:10.1242/jcs.041343), 2006-01-01
Supplement: jcs041343-sup-041343-tables1.pdf [file jcs041343-sup-041343-tables1.pdf]

**Table S1.** PCR primers applied for qPCR analysis in L6 GLUT4myc myoblasts

|              | <b>Forward</b>           | <b>Reverse</b>           |
|--------------|--------------------------|--------------------------|
| <b>Actin</b> | TGTCACCAACTGGGACGAT<br>A | ACCCTCATAGATGGGCAC<br>AG |
| <b>CIP4a</b> | AACCGAGAGTTGCAGAAG<br>GA | ATCAGGTGGGGCAGTAGT<br>TG |
| <b>CIP4h</b> | GAGCAGCTTCCAGCCGTAG      | CTCGCTCAGTATGGCCAA<br>G  |
| <b>FBP17</b> | CCGACATCAATGTGACCAA<br>G | TATACCGTCCAGGCACTTC<br>C |
| <b>Toca1</b> | ACCAGAGCAGAGGCGTAA<br>GA | ACACCTGTTTTGCCTTCCA<br>C |
