# Supplementary material for: La suspensión sin garantía de los actos tributarios: un derecho sin pleno contenido material en España: causas, efectos y soluciones
Source: Oxford University Press journal article supplement (doi:10.1242/jcs.041343), 2006-01-01
Supplement: jcs041343-sup-041343-tables2.pdf [file jcs041343-sup-041343-tables2.pdf]

**Table S2.** apFRET data collection settings

|                           | <b>Image settings</b> |         | <b>Bleach settings</b> |
|---------------------------|-----------------------|---------|------------------------|
|                           | CFP                   | YFP     | YFP                    |
| Laser power               | 80%                   | 80%     | 80%                    |
| Transmission<br>%         | 30%                   | 30%     | 100%                   |
| Scan speed                | 9                     | 9       | 9                      |
| Pixel drift<br>( $\mu$ s) | 1.60                  | 1.60    | 1.60                   |
| Detector gain             | 800-1000              | 400-600 | -                      |
