# Supplementary figures and images for: La suspensión sin garantía de los actos tributarios: un derecho sin pleno contenido material en España: causas, efectos y soluciones
Source: Oxford University Press journal article supplement (doi:10.1242/jcs.041343), 2006-01-01

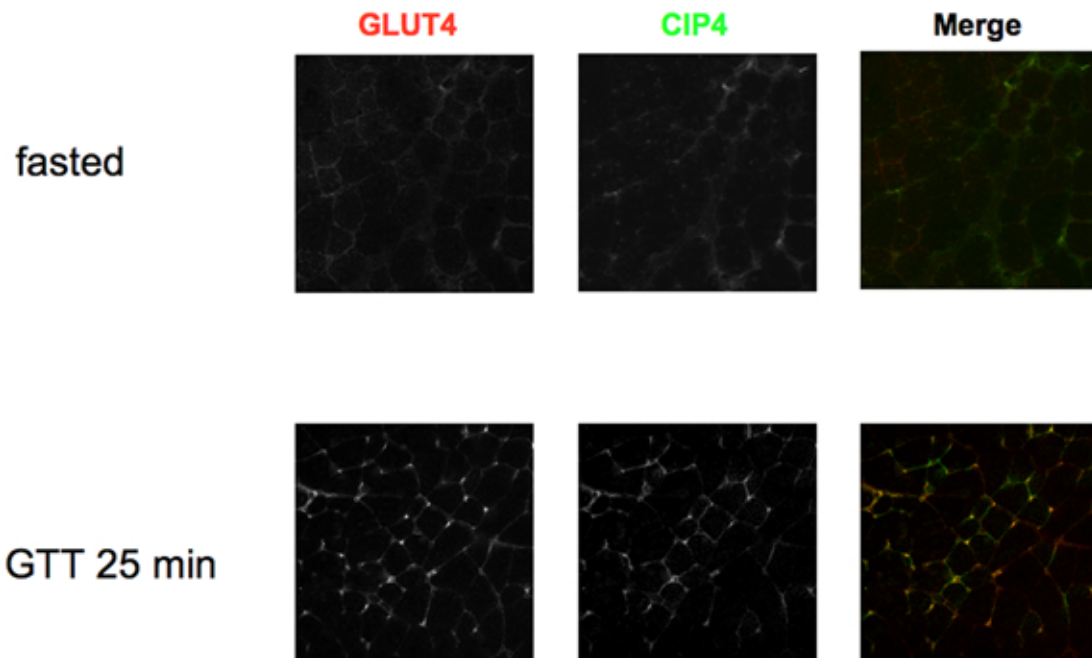

Supplement: jcs041343-sup-041343-figs1.pdf [file jcs041343-sup-041343-figs1.pdf]
